# Supplementary material
Source: PubMed Central journal article supplement (PMC4455264)
Supplement: JB.00234-15_zjb999093647so1.pdf [file JB.00234-15_zjb999093647so1.pdf]

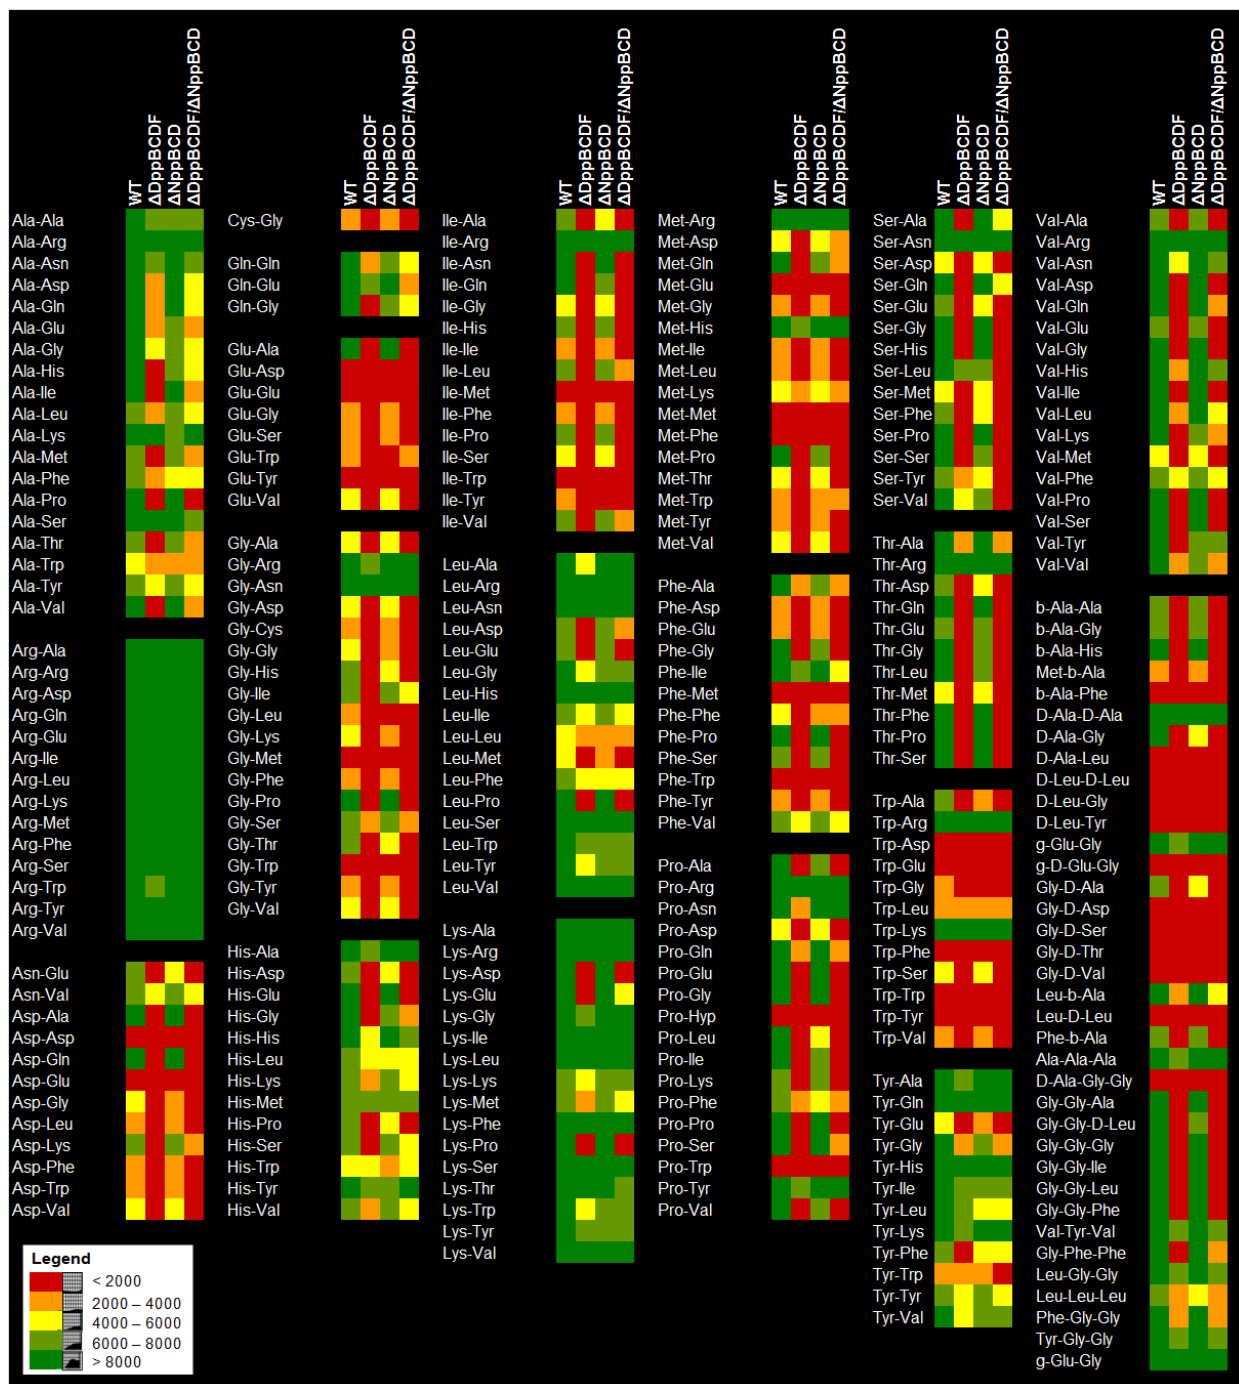

**FIG S1** Heat map of di/tripeptide utilization by *P. aeruginosa* PA14 and its *dppBCDF*, *nppBCD*, and *dppBCDF/nppBCD*-deficient mutants. Each square represents the average respiratory activity of a strain in one well of the Biolog Phenotype MicroArray plates. The heat map is based on the values reflecting the extent of respiration after 24 hours at 37°C. Values exceeding 8000 reflect solid respiratory activity during the assay. Values below 2000 were considered as no respiratory activity.

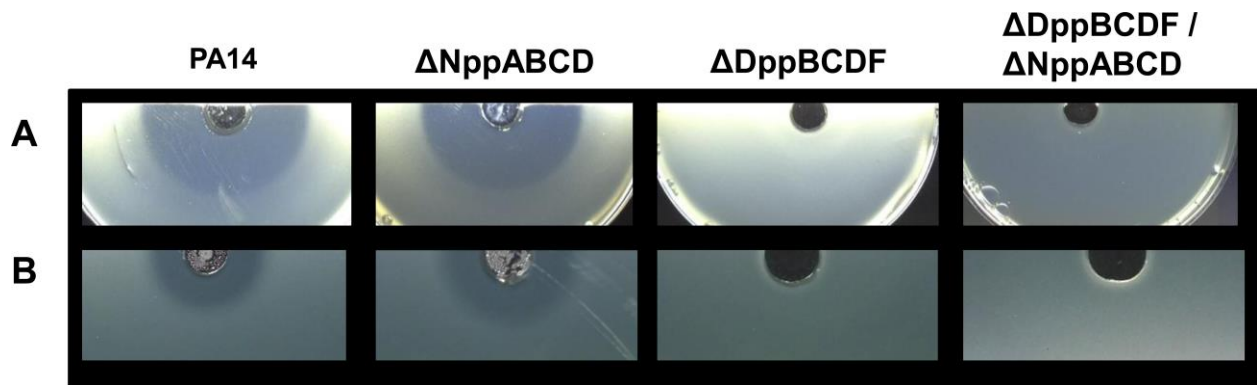

**FIG S2** Growth inhibition of *P. aeruginosa* PA14 and its *nppBCD*, *dppBCDF*, and *nppBCD/dppBCDF*-deficient mutants by the antimicrobial tripeptides (A) bialaphos (L-alanyl-L-alanyl-phosphinothricin) and (B) phaseolotoxin ( $N^{\delta}(N'$ -sulfodiaminophosphinyl)-ornithyl-alanyl-homoarginine).

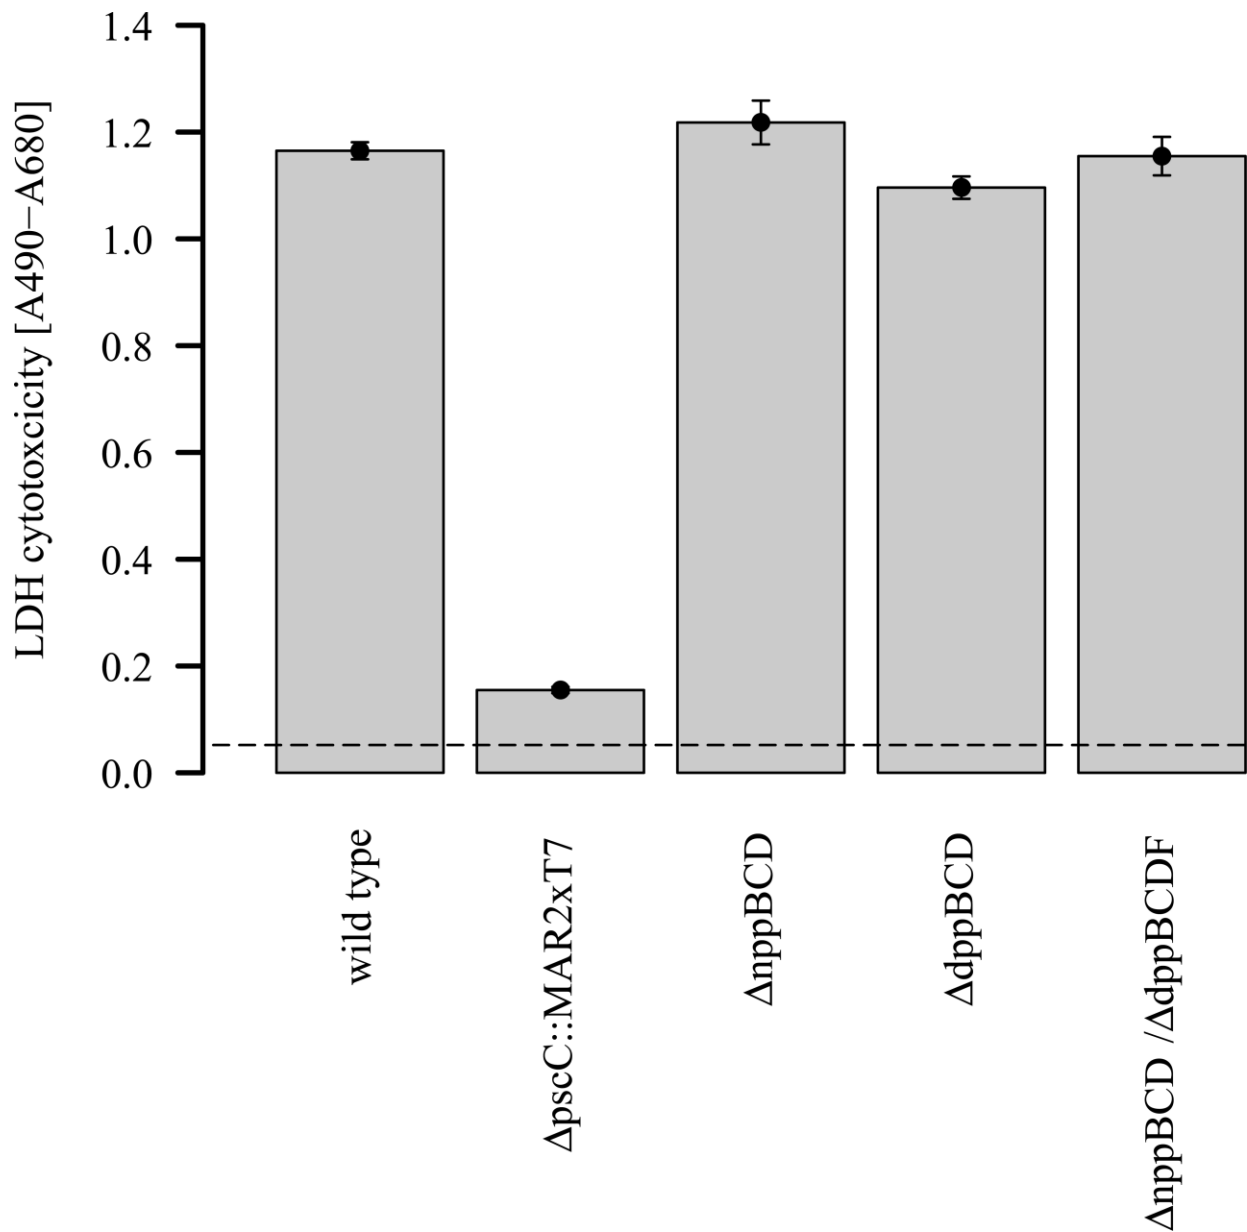

**FIG S3** Cytotoxicity assay of the *P. aeruginosa* wild-type strain, its corresponding *nppBCD*, *dppBCDF*, *nppBCD/dppBCDF* mutants, as well as the *pscC*-deficient mutant, which was serving as positive control. The release of lactate dehydrogenase (LDH) from human bronchial epithelial cells, infected with the indicated strains, into culture supernatants was measured 6 hours post incubation and experiments were performed in triplicates. The dashed line indicates the background noise produced by the inducing medium.

**TABLE S1** Primers used in this study.

| Primer                                                             | Sequence (5' - 3')                                                            | Characteristic(s)                                                                                |
|--------------------------------------------------------------------|-------------------------------------------------------------------------------|--------------------------------------------------------------------------------------------------|
| <b>NppBCD transporter knockout (PA14_41140 – PA14_41160)</b>       |                                                                               |                                                                                                  |
| 41130-A1                                                           | CATCCTGCCGTTCAAGCG                                                            | used to clone PA14 <i>nppBCD</i> knockout vector                                                 |
| 41130-A2                                                           | CCCTATAGTGAGTCGGTACCGCGGCGTTACTCCCGTTC                                        | used to clone PA14 <i>nppBCD</i> knockout vector                                                 |
| 41170-B1                                                           | GGTACCGACTCACTATAGGGGTAGCAGACAAGGAACGG                                        | used to clone PA14 <i>nppBCD</i> knockout vector                                                 |
| 41170-B2                                                           | TGTAGTTCGGCATGGTCC                                                            | used to clone PA14 <i>nppBCD</i> knockout vector                                                 |
| 41130_out1                                                         | CAAGATTCCCGACGAGGC                                                            | Primer flanking PA14 <i>nppBCD</i> knockout fragment (used to confirm GM-GFP cassette insertion) |
| 41170_out2                                                         | TGCCGACTTCCTCGATGG                                                            | Primer flanking PA14 <i>nppBCD</i> knockout fragment (used to confirm GM-GFP cassette insertion) |
| Gm-GFP_out-F                                                       | CAGGGCAGTCGCCCTAA                                                             | Primer within Gm-GFP cassette (used to confirm GM-GFP cassette insertion)                        |
| Gm-GFP_out-R                                                       | TACTCCAATTGGCGATGGC                                                           | Primer within Gm-GFP cassette (used to confirm GM-GFP cassette insertion)                        |
| <b>NppBCD transporter overexpression (PA14_41110 – PA14_41160)</b> |                                                                               |                                                                                                  |
| 41110_fwd(SpeI)                                                    | CAACTAGTCTGTTGCCTGACGATTCCG                                                   | used to clone <i>nppABCD</i> overexpression vector                                               |
| 41170_rev(SacI)                                                    | CTGAGCTCTGGTCCGTTCTTGCTCTG                                                    | used to clone <i>nppABCD</i> overexpression vector                                               |
| <b>YejABEF transporter knockout</b>                                |                                                                               |                                                                                                  |
| yej-ko_fwd                                                         | AAAGCATGCCGGATTGCGGCTAATGATGAGTAAAAGGAA<br>ATCCGTTGCAGTGTAGGCTGGAGCTGCTTCG    | Primer with a 50-nt homology flanking <i>yejABEF</i> of <i>E. coli</i> W3110                     |
| yej-ko_rev                                                         | TTGGTGTGGCAATTGCCGAACCCTTTTCAAACACTACAATCC<br>TTTTTAAGCGTGGTCCATATGAATATCCTCC | Primer with a 50-nt homology flanking <i>yejABEF</i> of <i>E. coli</i> W3110                     |
| yej_out1                                                           | GCGCGCTTATCTATCTTGAGC                                                         | Primer flanking the <i>yejABEF</i> knockout fragment                                             |
| yej_out2                                                           | GAATGTGCTTCCGGGGAAA                                                           | Primer flanking the <i>yejABEF</i> knockout fragment                                             |
